# Supplementary material for: Filamin A Orchestrates Cytoskeletal Structure, Cell Migration and Stem Cell Characteristics in Human Seminoma TCam-2 Cells
Source: MDPI journal article supplement (doi:10.3390/cells9122563), 2020-11-30

Original PCR-Data: Fig. S1

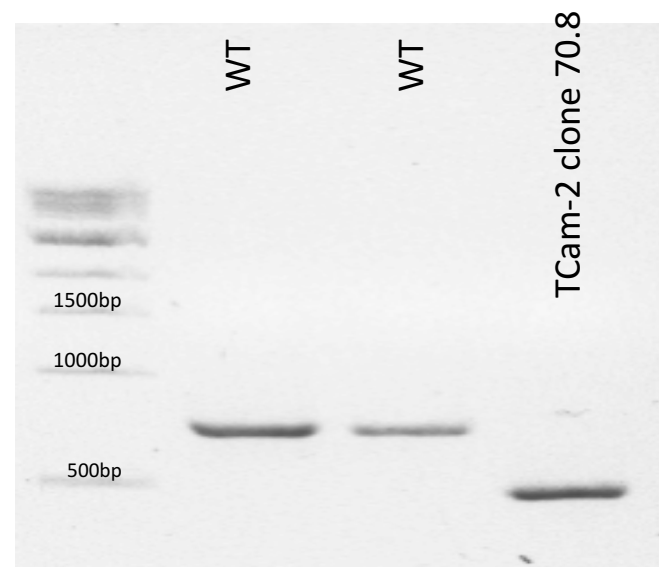

Original WB-Data: Fig. 3

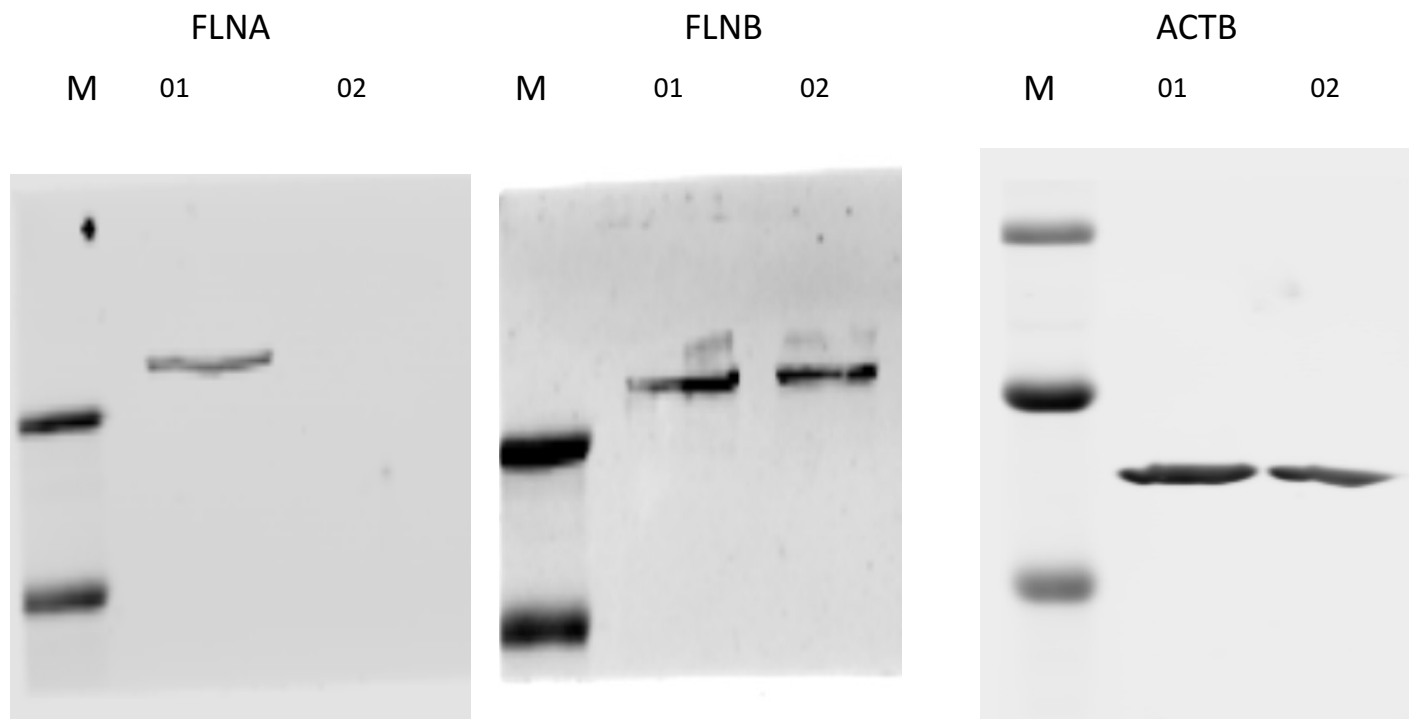

M: Marker

01: TCam-2 WT

02: TCam-2 FLNA-KO

Former Original WB-Data: Fig. 6

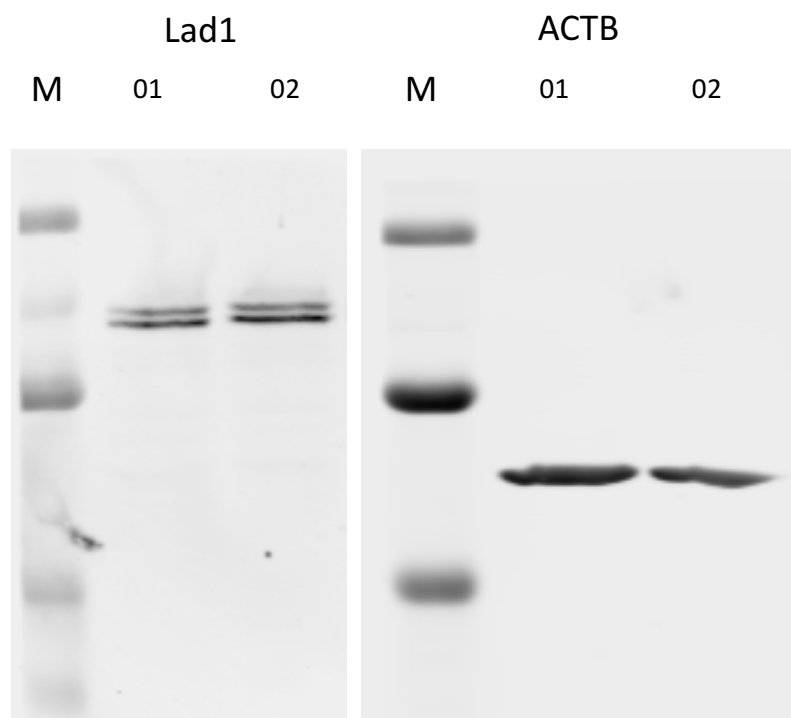

M: Marker

01: TCam-2 WT

02: TCam-2 FLNA-KO

**New** Original WB-Data: Fig. 6

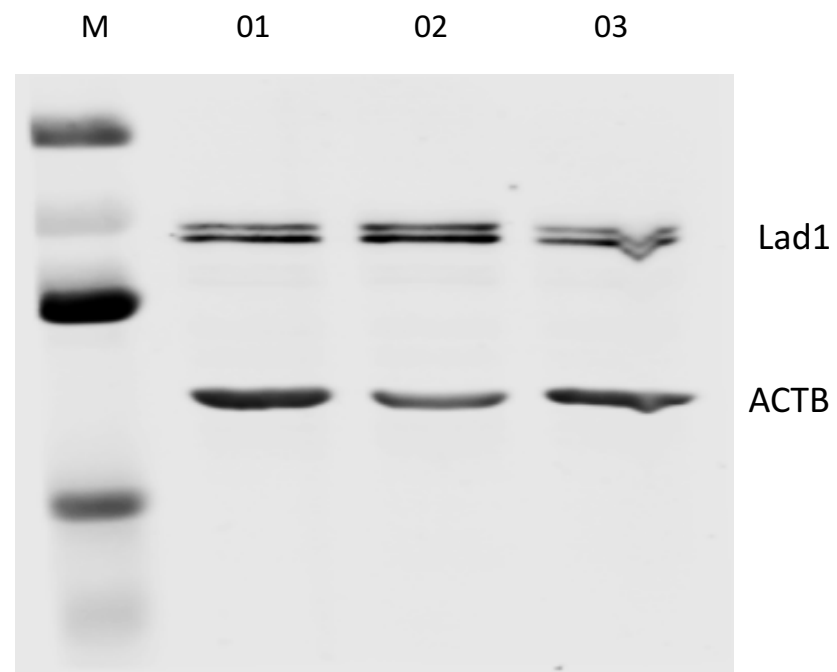

M: Marker  
01: TCam-2 WT  
02: TCam-2 FLNA-KO Clone 70.8  
03: Tcam-2 FLNA-KO Clone 71.3

Original WB-Data: Fig. 7

01: TCam-2 WT

02: TCam-2 FLNA-KO

WB: Nanog

01 02

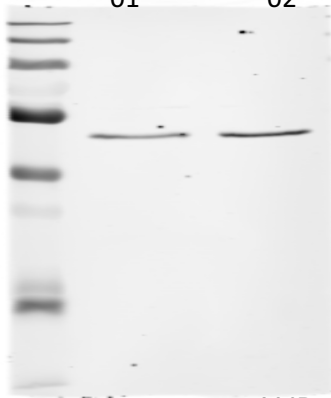

WB1: Oct3/4

01 02

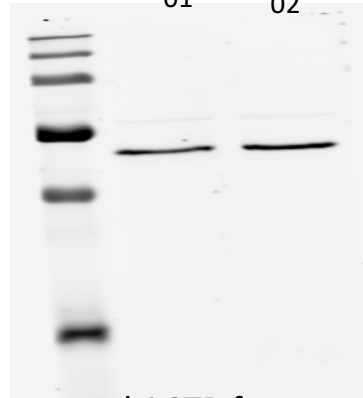

WB2: Oct3/4

01 02

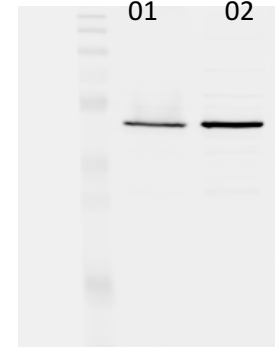

WB: Loading control ACTB for  
NANOG, WB1: OCT3/4

01 02

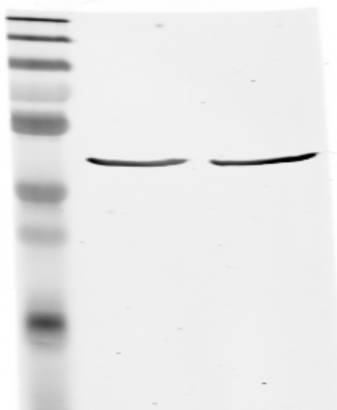

WB2: Loading control Tubulin for WB2: OCT3/4  
(not quantified)

01 02

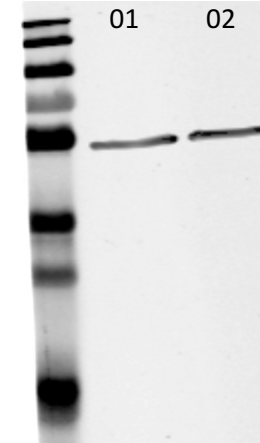

# Original IP-Data: Fig. S

Tcam-2 cells: IP using antibodies directed against FLNA or FLNB and protein G beads

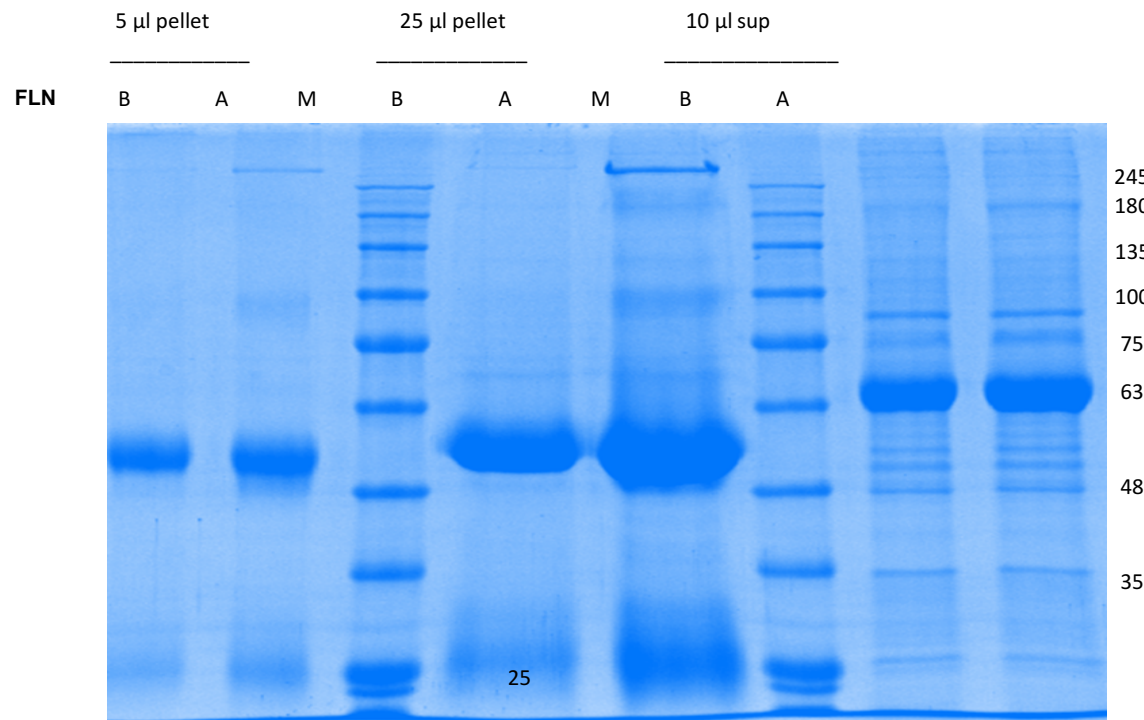

Protein G Pellet in 80 µl 2x SB > load: 5 or 25 µl

" Sup: 200 µl + 200 µl 2x SB > Load: 10 µl

Western blot analysis of potential FLN interactors

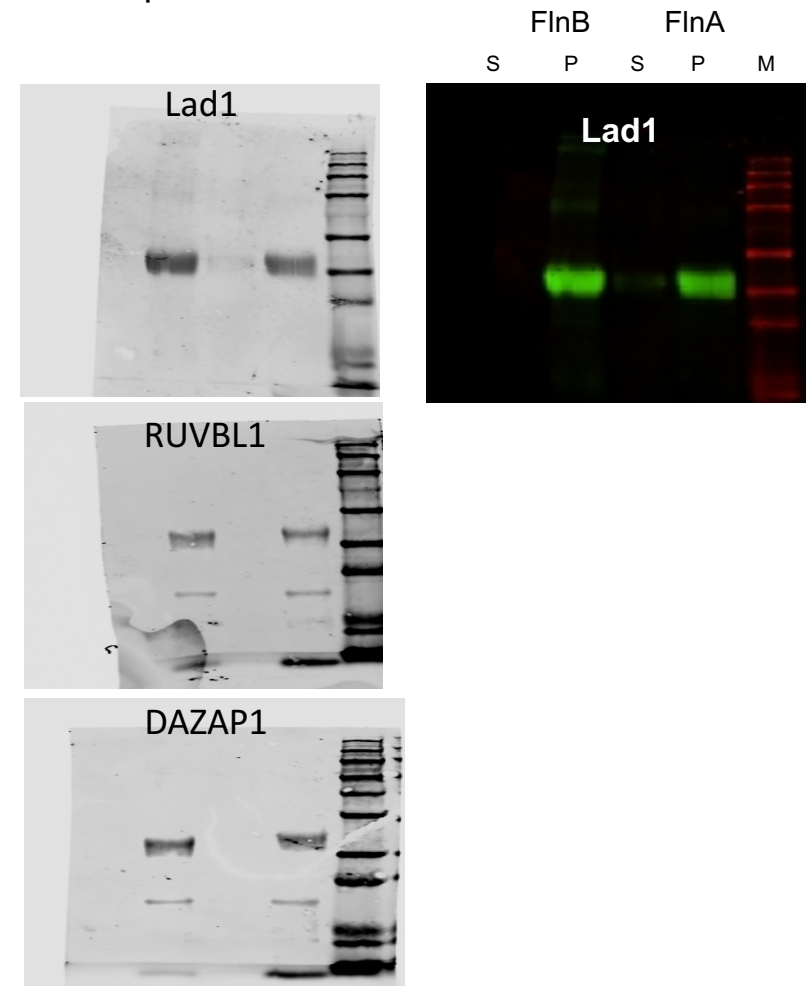

Supplement: s1 [file s1]
